# Supplementary material for: Recombinant Peptide Production Softens Escherichia coli Cells and Increases Their Size during C-Limited Fed-Batch Cultivation
Source: MDPI journal article supplement (doi:10.3390/ijms24032641), 2023-01-30
Supplement: s1 [file s1]

# **Recombinant peptide production softens *Escherichia coli* cells and increases their size during C-limited fed-batch cultivation**

## **Supplementary materials**

Authors: Andreas Weber<sup>†,1,2</sup>, Martin Gibisch<sup>†,1</sup>, Daniel Tyrakowski<sup>2</sup>, Monika Cserjan-Puschmann<sup>1</sup>, José L. Toca-Herrera<sup>2,\*</sup> Gerald Striedner<sup>1</sup>

Affiliations:

1 Christian Doppler Laboratory for production of next-level biopharmaceuticals in *E. coli*, Institute of Bioprocess Science and Engineering, Department of Biotechnology, University of Natural Resources and Life Sciences, Vienna, Muthgasse 18, 1190 Vienna, Austria

2 Institute of Biophysics, Department of Nanobiotechnology, University of Natural Resources and Life Sciences; Muthgasse 11, 1190 Vienna, Austria.

† These authors have contributed equally.

\* Corresponding author.

Keywords: Peptide expression, Bioprocess engineering, Bacteria, Periplasmic space, Viscoelasticity, Biophysics, Membrane properties, Atomic Force Microscopy

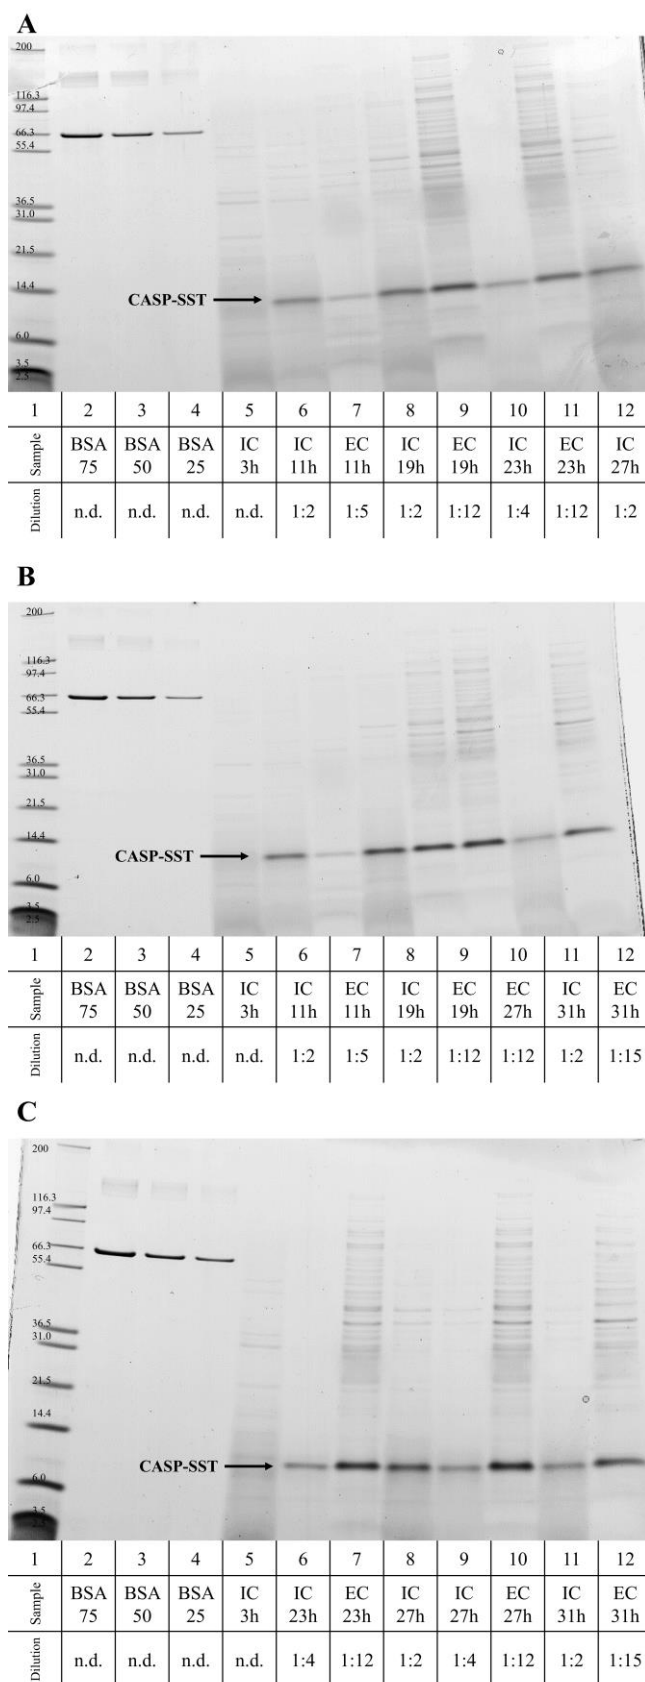

**Figure S1.** SDS-PAGE gels (panels A–C) for quantification of intracellular (IC) and extracellular (EC) peptide content. All samples were analysed at least twice. 3 h samples represent uninduced reference samples. CASP-SST bands (black arrow) were quantified via ImageQuant™ using BSA standards (lanes

2-4, 75-25  $\mu\text{g mL}^{-1}$ ). Samples were diluted to fit the linear range of the standard, and non-diluted samples are indicated as n.d.

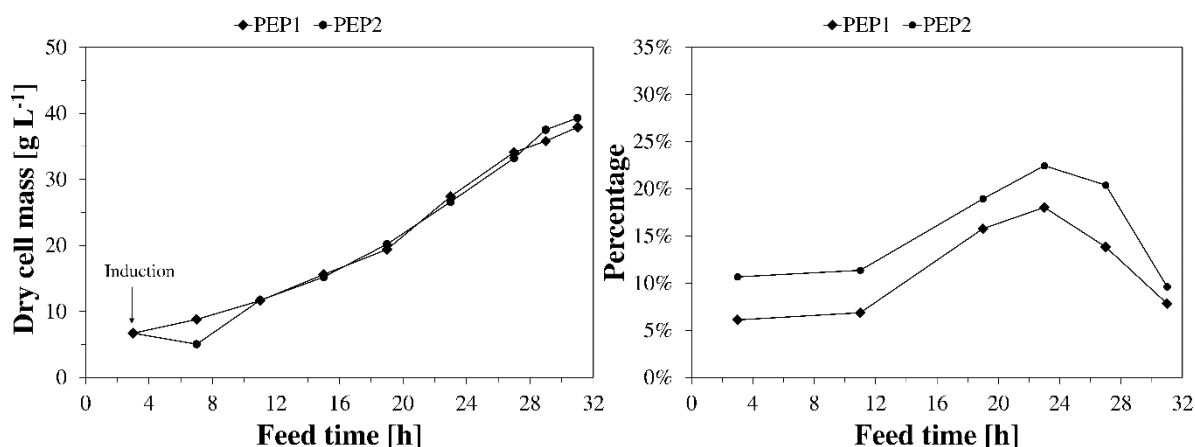

**Figure S2:** Growth curves (A) and cell lysis curves (B) of duplicate cultivations with PEP. Minor deviations in DCM (e.g. after 7 h) likely arise from errors during sample preparation. Cell lysis variation might arise from differences in timepoint of sample preparation and DNA measurement (DNA instability).

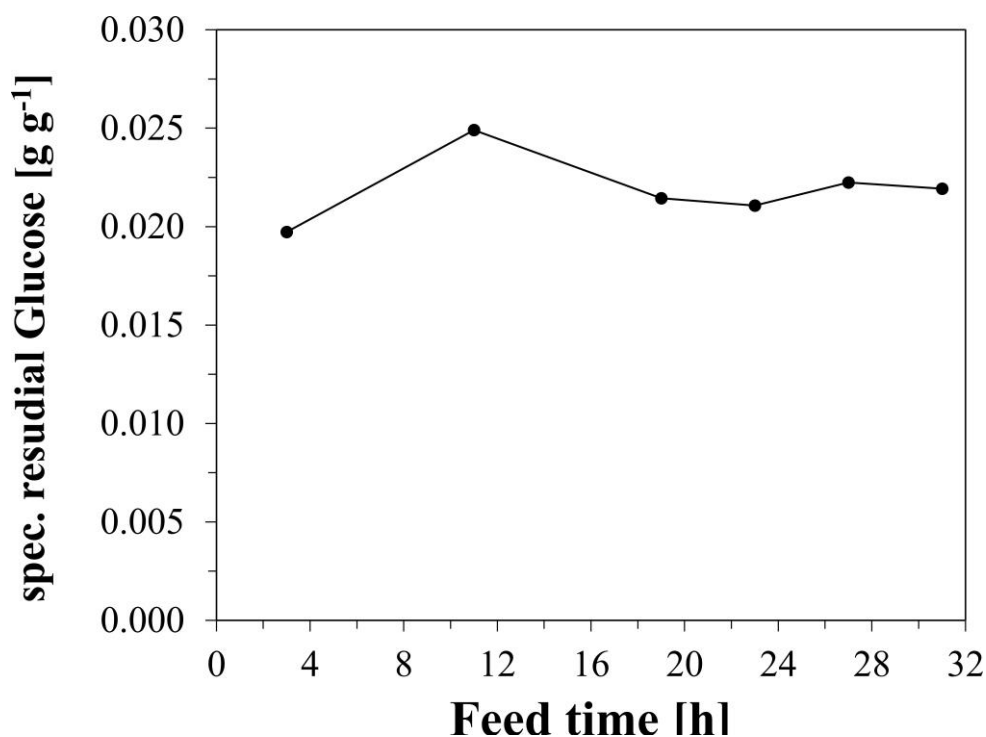

**Figure S3.** Specific residual glucose concentration in the cell-free cultivation medium of PEP. Glucose concentrations were analysed using HPLC as previously described by Marisch et al., 2013 (<https://doi.org/10.1186/1475-2859-12-58>).

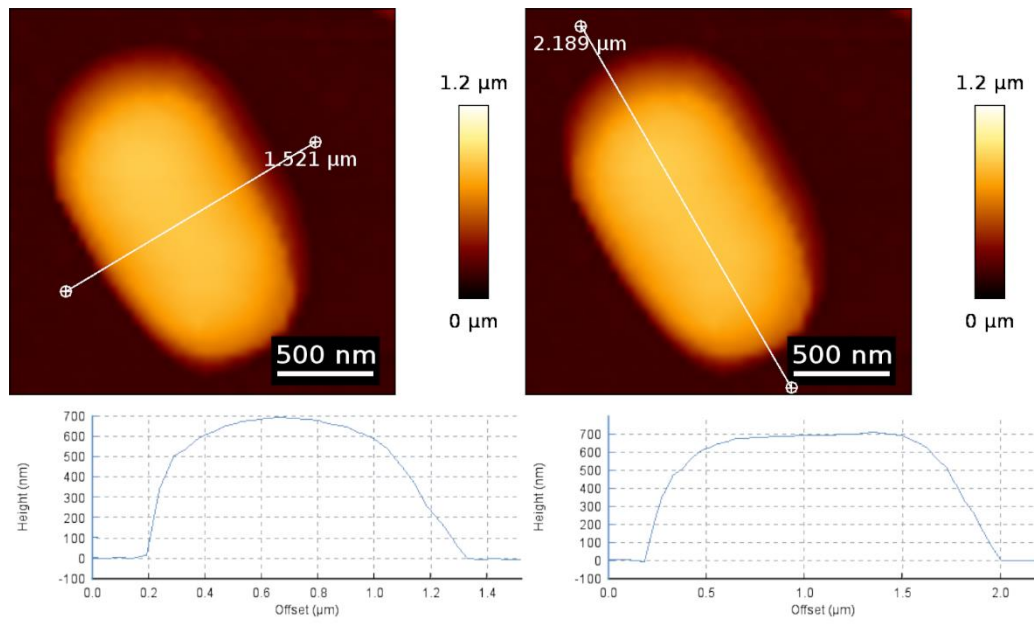

**Figure S4.** Analysis of cell width (**left**) and cell length (**right**) from AFM images.

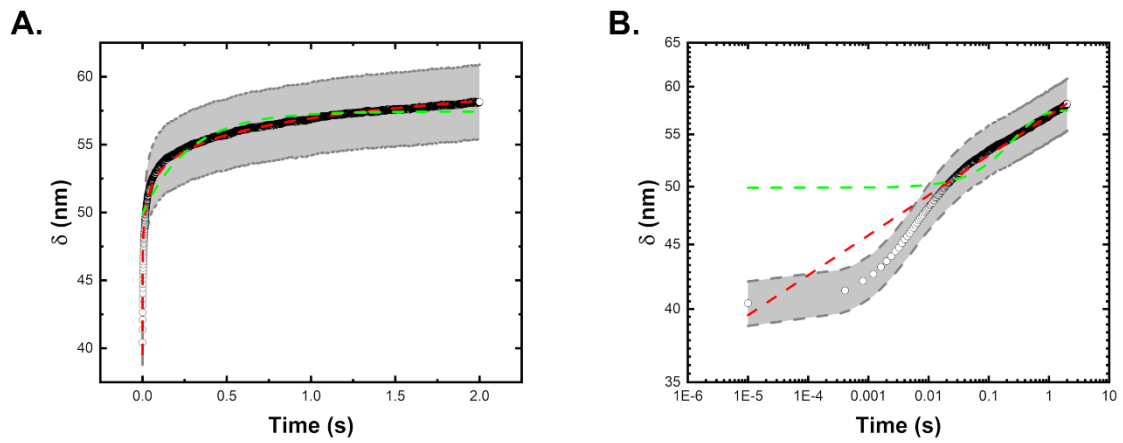

**Figure S5.** Performance of fitting procedures for creep curves (red power law, green standard linear solid) in normal representation (**A**) and logarithmic representation (**B**).

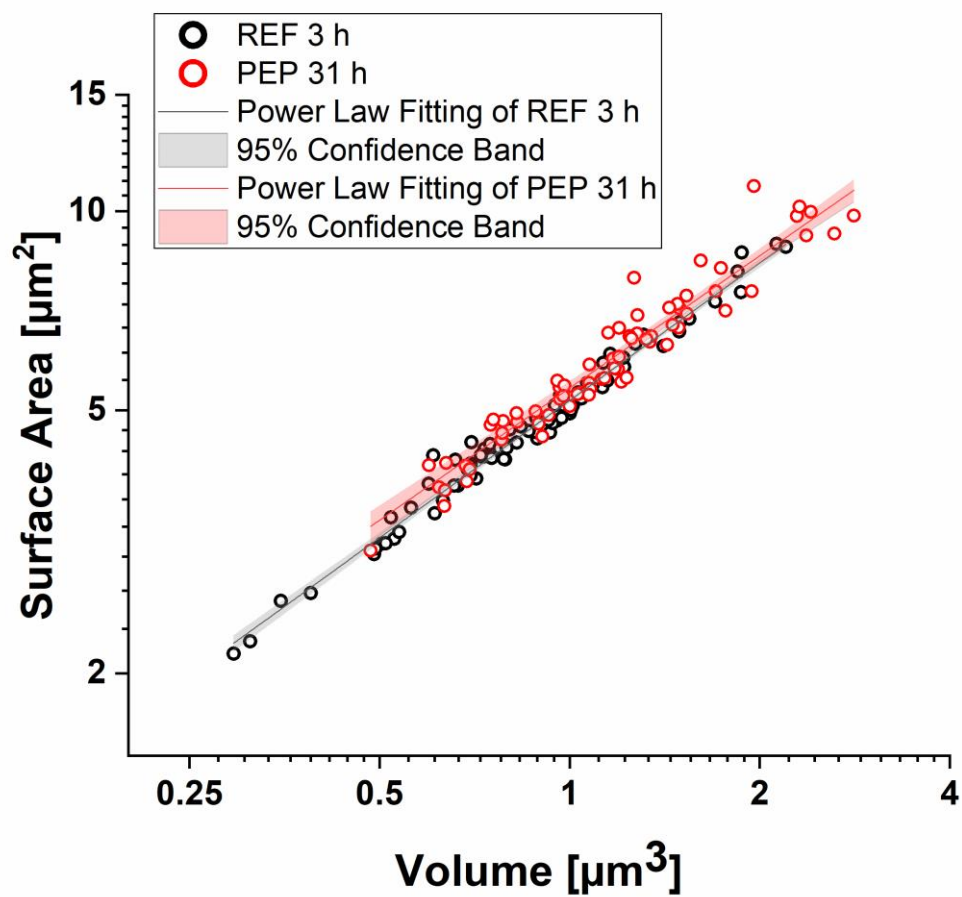

**Figure S6.** Surface area to volume scaling is conserved for the different samples. Here shown is REF 3h and PEP 31 h.

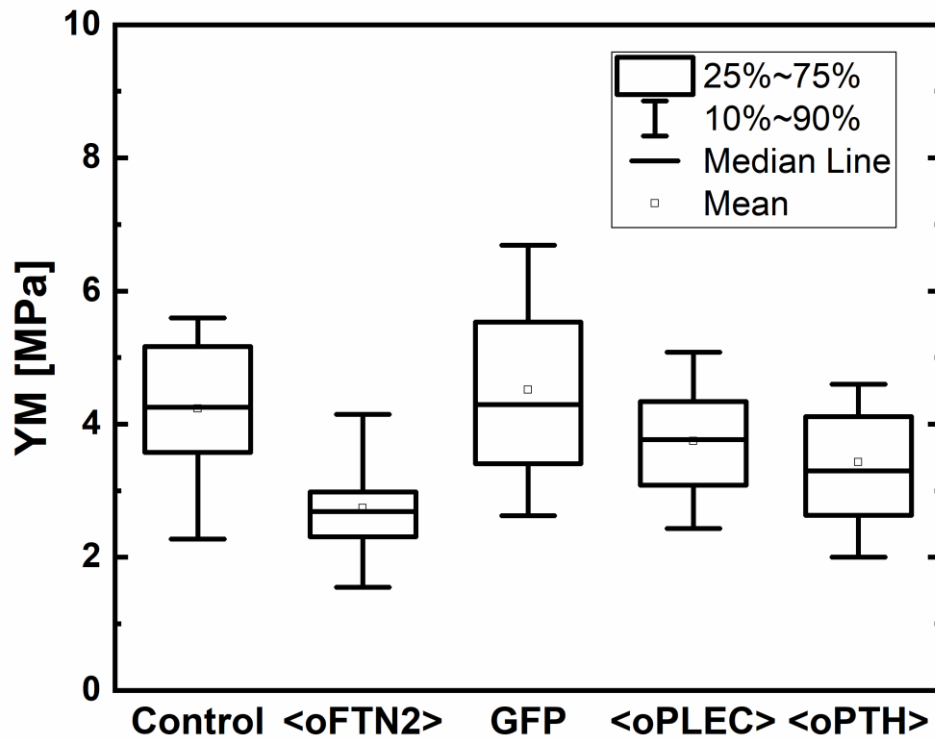

**Figure S7.** Apparent Young's Modulus of BL21(DE3) cells expressing recombinant Fab fragments (FTN2), green fluorescent protein (GFP), antimicrobial peptide plectasin (PLEC), and parathyroid hormone (PTH). Measurements of BL21(DE3) cells without any protein/peptide production are indicated as control. Brackets (< >) indicate genomic integration of the recombinant gene into the host. Translocation into the periplasmic space via the OmpA signal sequence of the respective protein/peptide is indicated as "o". Respective cultivations were carried out as described in the material and method section.
